# Supplementary material for: The Use of Point-of-Care Ultrasound (POCUS) in the Diagnosis of Deep Vein Thrombosis
Source: MDPI journal article supplement (doi:10.3390/jcm10173903), 2021-08-30
Supplement: s1 [file s1]

## **Supplementary Videos**

**Supplementary video 1.** 3-point POCUS technique for evaluation of acute proximal DVT in the right lower extremity. The “frog-leg” position is depicted. Veins were fully compressible in all points and no DVT was appreciated.

Abbreviations: Rt=right, CFV=common femoral vein, GSV=great saphenous vein, FV=femoral vein, DFV=deep femoral vein

**Supplementary video 2.** 3-point POCUS technique for evaluation of acute proximal DVT in the left lower extremity. Veins were fully compressible in all points and no DVT was appreciated.

Abbreviations: Lt=left, CFV=common femoral vein, GSV=great saphenous vein, FV=femoral vein, DFV=deep femoral vein

**Supplementary video 3.** Detection of left femoral vein DVT at the bifurcation. The vein lacks compression.

**Supplementary video 4.** Detection of left femoral vein DVT at the great saphenous vein – common femoral vein junction. The vein lacks compression.

**Supplementary video 5.** Detection of right femoral vein DVT at the great saphenous vein – common femoral vein junction. Thrombus is visible.

**Supplementary video 6.** Detection of left femoral vein DVT distally. Thrombus is visible.

**Supplementary video 7.** Detection of right popliteal vein DVT. Thrombus is visible.

**Supplementary video 8.** Detection of left popliteal vein DVT. The vein lacks compression and thrombus is visible.

**Supplementary video 9.** A Baker's cyst can be mistaken for a non-compressible popliteal vein and lead to misdiagnosis of popliteal thrombosis.

**Supplementary video 10.** An enlarged inguinal lymph node can be mistaken for thrombus and lead to misdiagnosis of thrombosis.
