# Supplementary material for: The Use of Point-of-Care Ultrasound (POCUS) in the Diagnosis of Deep Vein Thrombosis
Source: J Clin Med. 2021 Aug 30;10(17):3903. doi: 10.3390/jcm10173903 (PMC8432124; doi:10.3390/jcm10173903)
Supplement: Supplementary file 1 [file jcm-10-03903-s001.zip]

Archive with 11 entries (11 files):
- Supplementary Video 1.mp4
- Supplementary video 10.mp4
- Supplementary Video 2.mp4
- Supplementary video 3.mp4
- Supplementary video 4.mp4
- Supplementary video 5.mp4
- Supplementary video 6.mp4
- Supplementary video 7.mp4
- Supplementary video 8.mp4
- Supplementary video 9.mp4
- Supplementary Videos.pdf
